# Supplementary material for: Pyrroloquinoline quinone (PQQ) protects mitochondrial function of HEI-OC1 cells under premature senescence
Source: PubMed Central journal article supplement (PMC9158787; doi:10.1038/s41514-022-00083-0), 2022-04-19
Supplement: 41514_2022_83_MOESM2_ESM.pdf [file 41514_2022_83_MOESM2_ESM.pdf]

Supplementary Information

Supplementary Figure 1 Full-length Western blot images

(a) Full-length blot image for SIRT1.

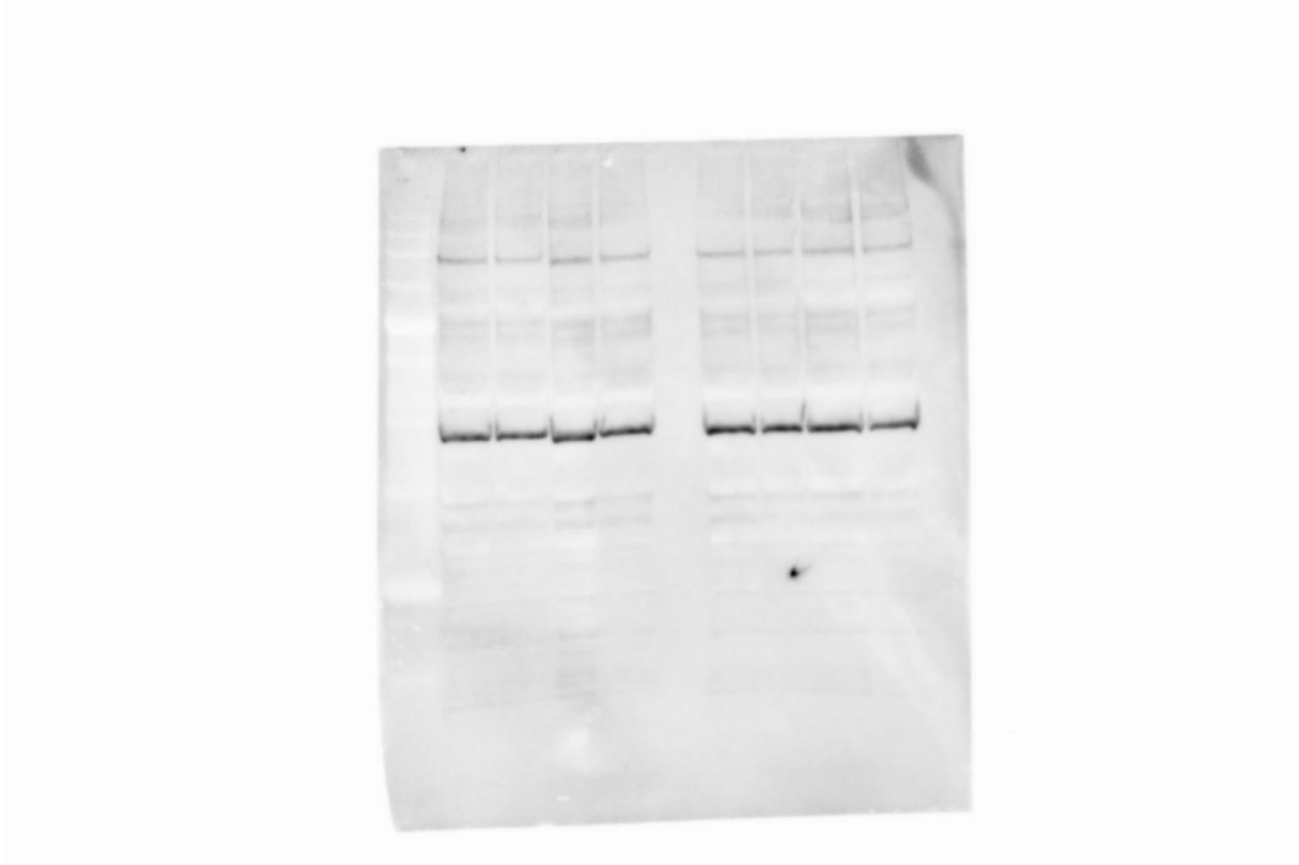

(b) Full-length blot image for PGC-1 $\alpha$ .

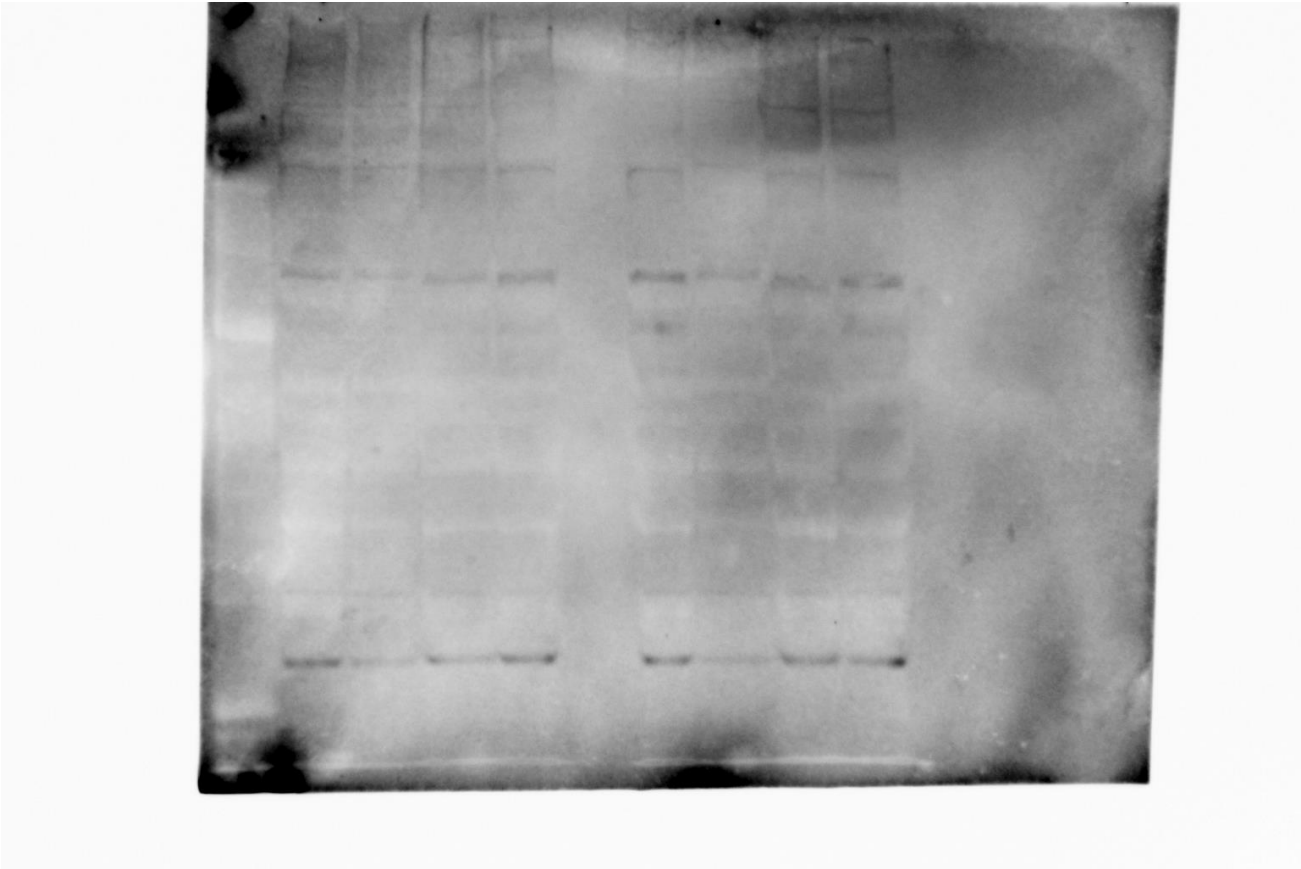

(c) Full-length blot image for  $\beta$ -actin.

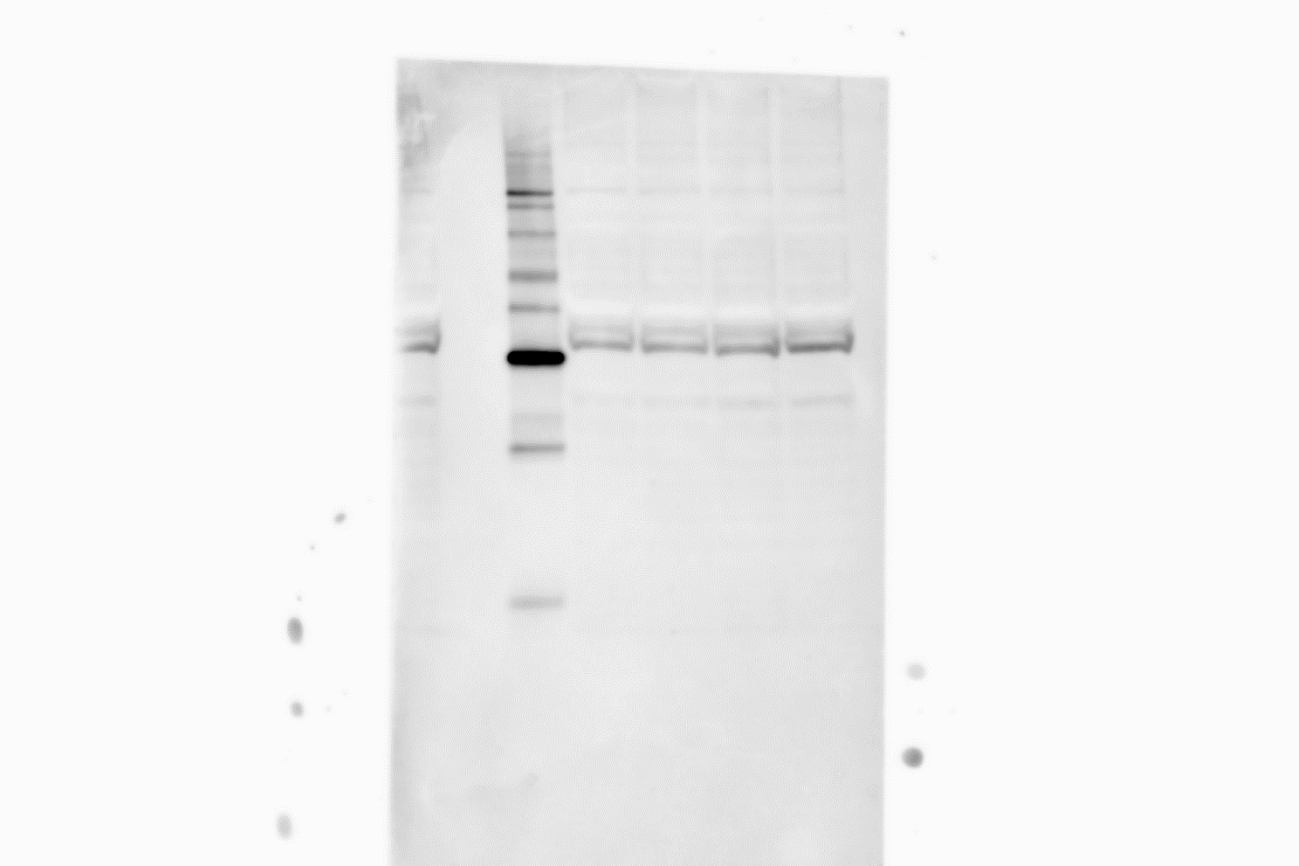

(d) Full-length blot image for acetylated-lysine (immunoprecipitation).

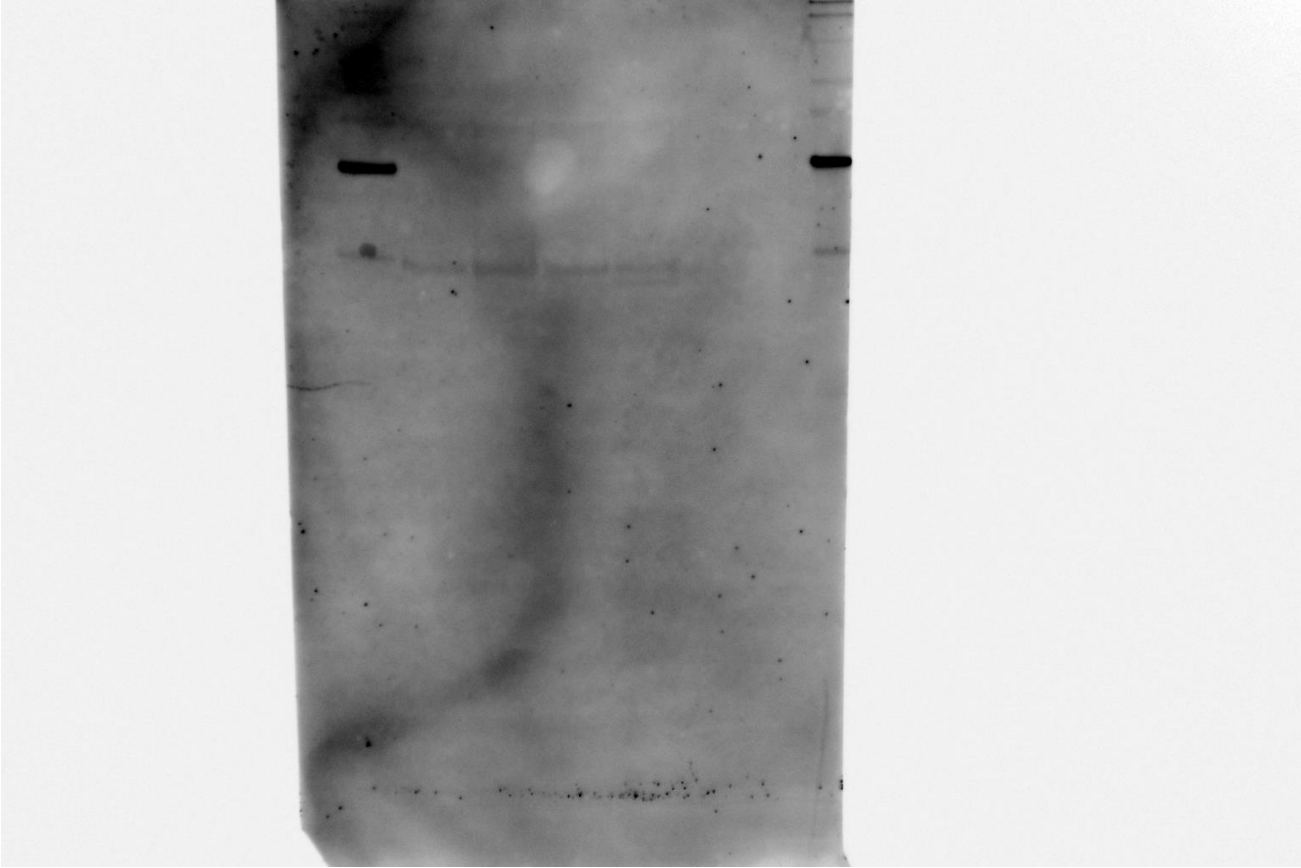

(e) Full-length blot image for PGC-1 $\alpha$  (immunoprecipitation).

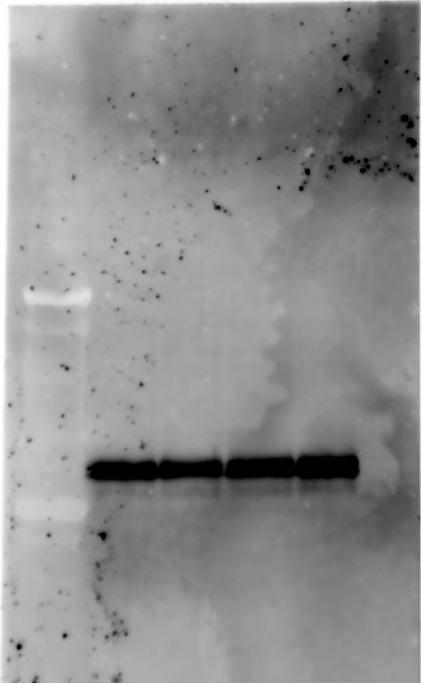

Supplementary Figure 2 SPiDER-βGAL microscopic images.

(a) Control group

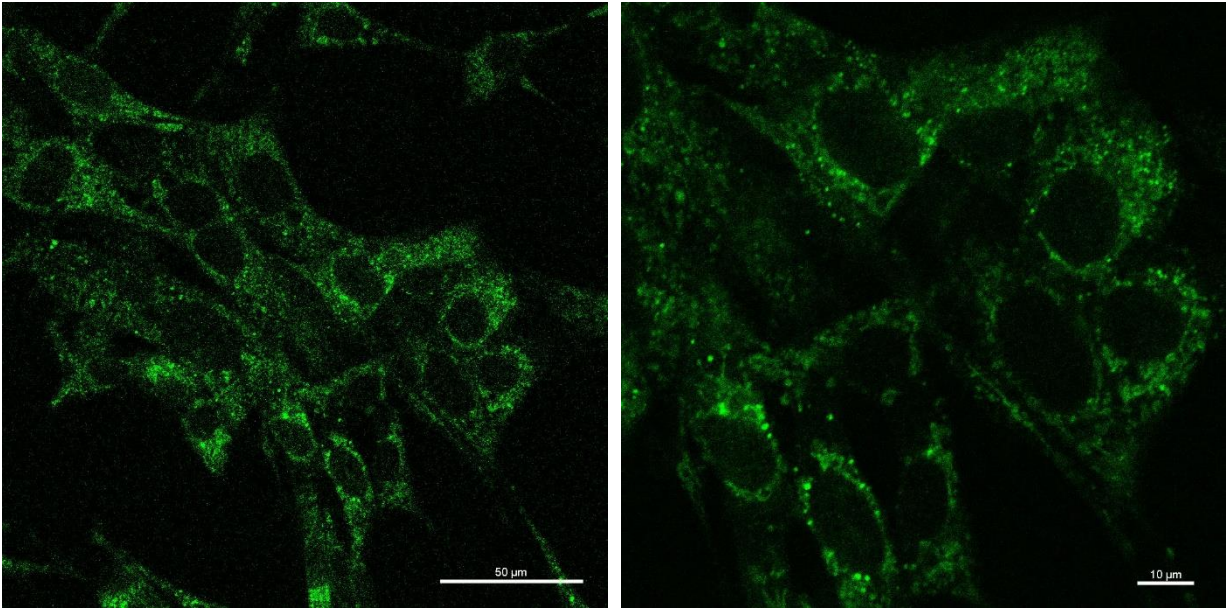

(b) H<sub>2</sub>O<sub>2</sub> exposed-group

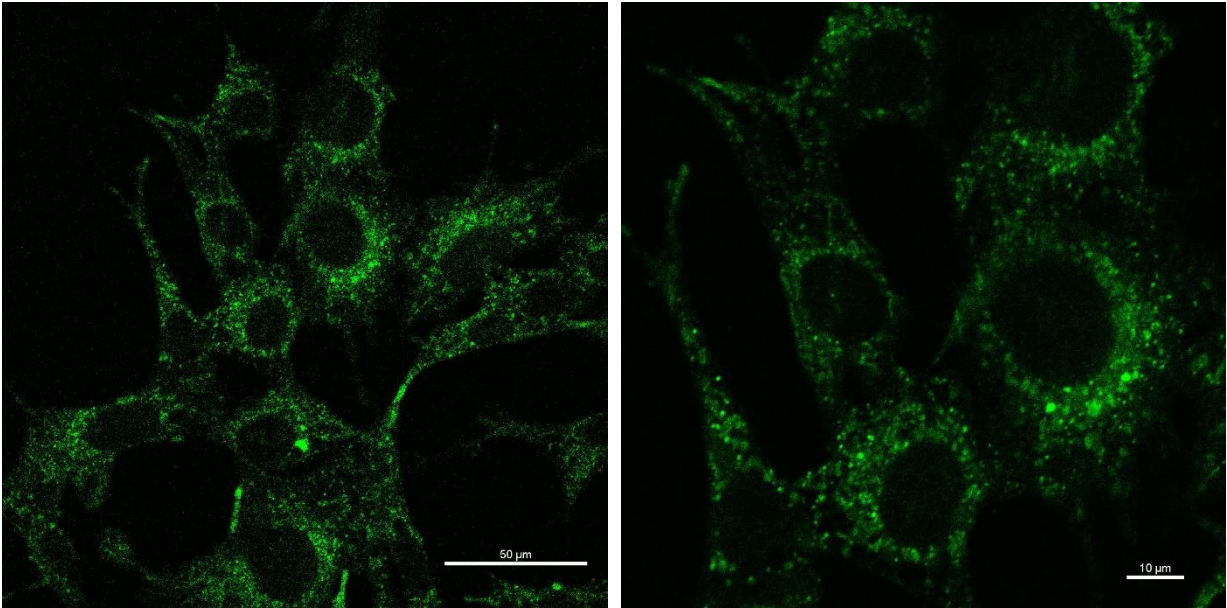

(c) PQQ 0.1nM treated H<sub>2</sub>O<sub>2</sub> exposed-group

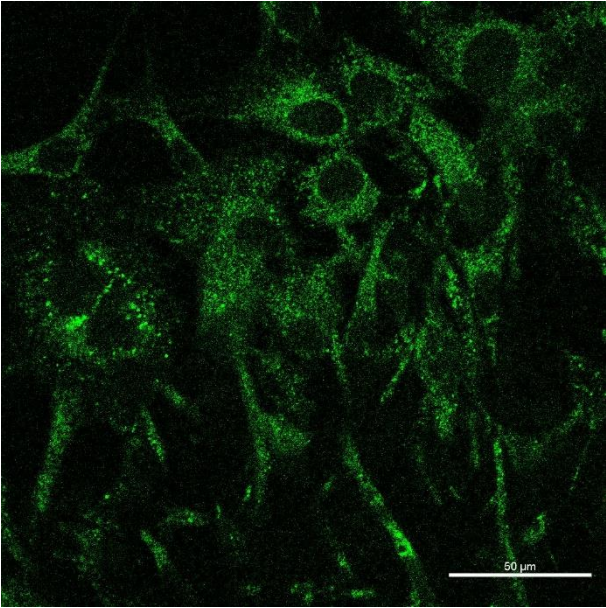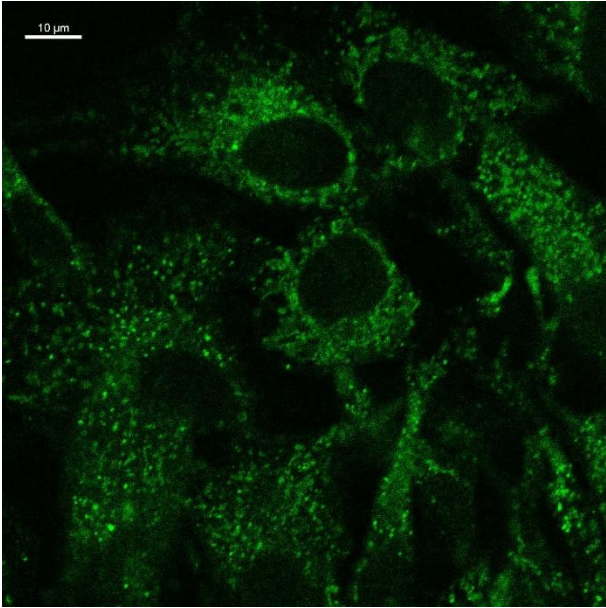

(d) PQQ 1.0nM treated H<sub>2</sub>O<sub>2</sub> exposed-group

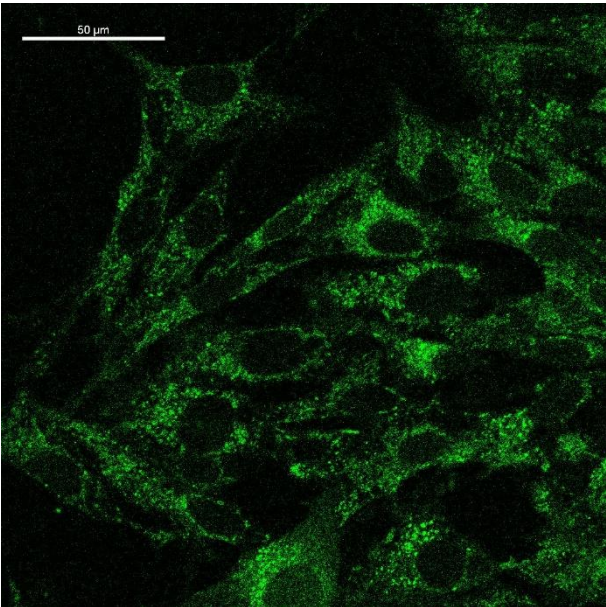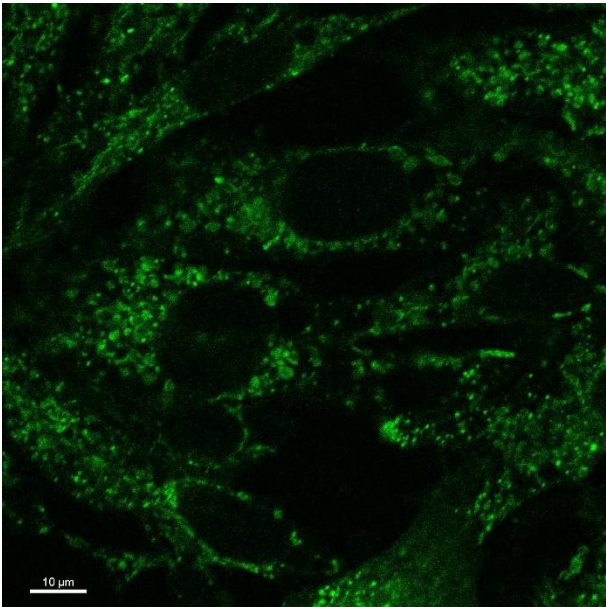

(a) The changes of MitoSOX Red intensity histogram in flow cytometry analysis.

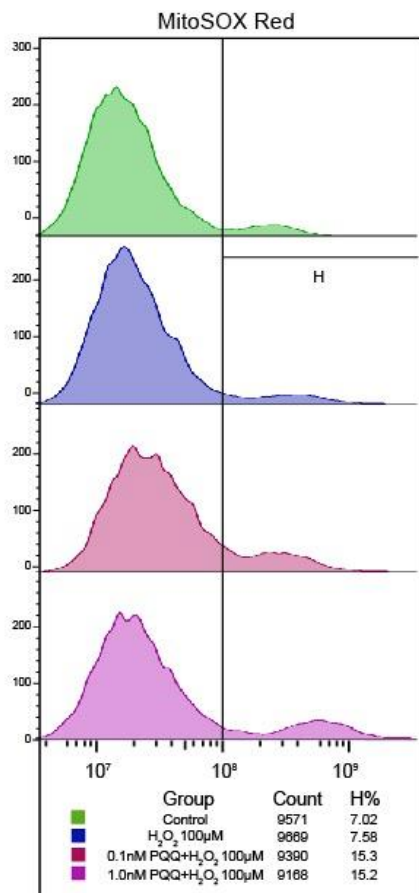

(b) The increased ratio in positivity rate over control of MitoSOX Red positive cells. (n = 5 per group; repeated experiments)

Box plot shows statistical parameters as follows; central line: median; box limits: first and third quartile; whiskers: minimum and maximum. \* p<0.05.

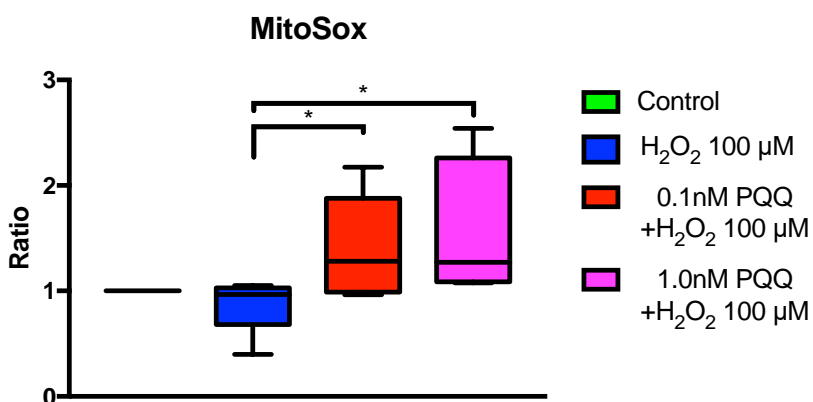



Supplementary Figure 4 The pH measurements of the XF24 analyzer

Data are shown as mean  $\pm$  standard deviation.

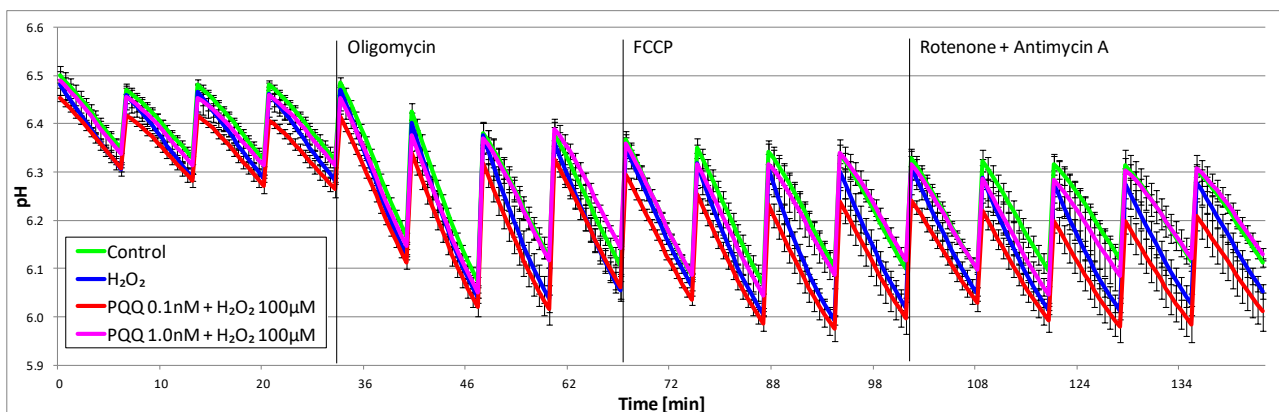

Supplementary Figure 5 The mitochondrial copy number analysis

Data are shown as mean  $\pm$  standard deviation.

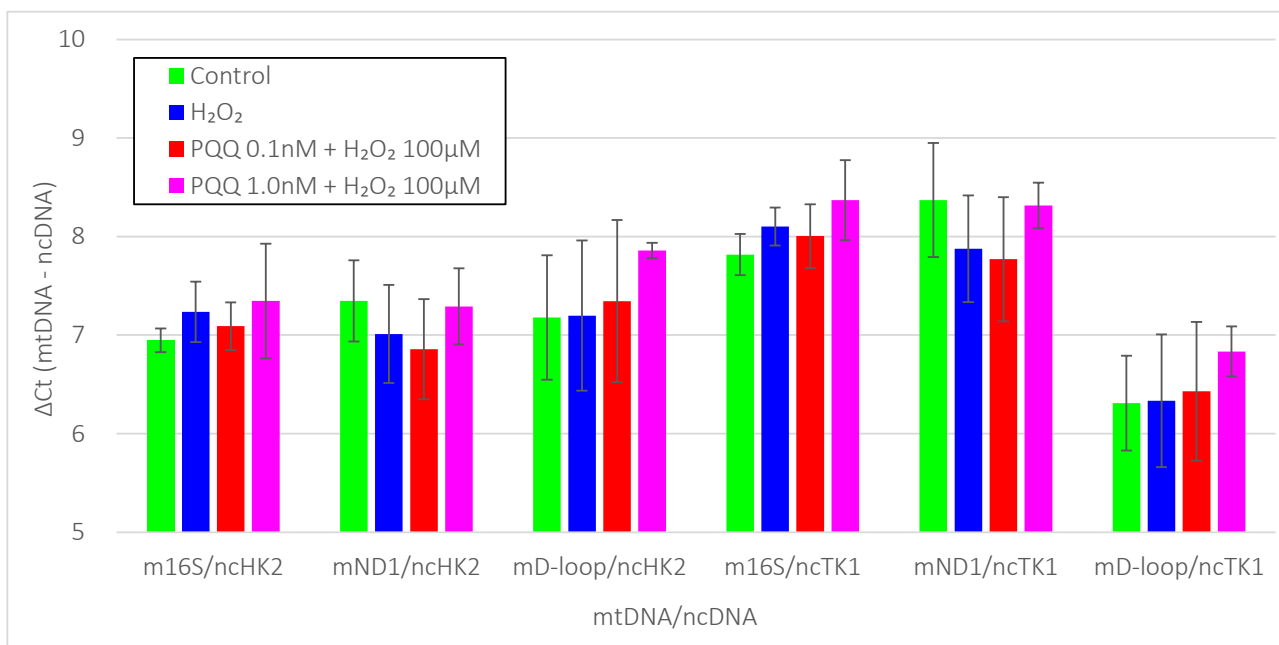

Supplementary Figure 6 Change in glucose concentration of the medium in the control group over time  
The glucose concentration of the medium decreased overtime from the days of passages (2021/6/27 and 2021/7/2).

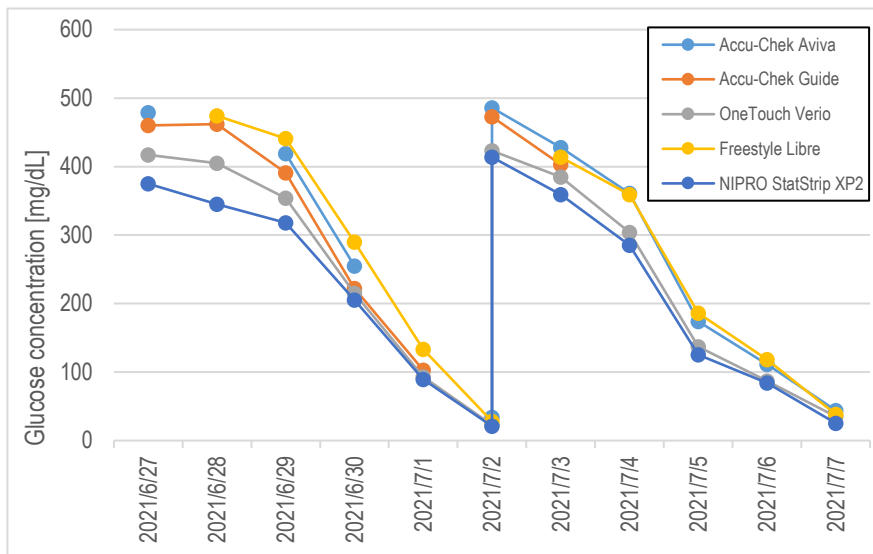

## Supplementary Data 1 XF Base Medium Formulation

|                                  |         |
|----------------------------------|---------|
| MgSO <sub>4</sub>                | 0.8 mM  |
| CaCl <sub>2</sub>                | 1.8 mM  |
| NaCl                             | 143 mM  |
| KCl                              | 5.4 mM  |
| NaH <sub>2</sub> PO <sub>4</sub> | 0.91 mM |
| Phenol Red                       | 3 mg/L  |

### Other Constituents:

L-Arginine\*HCl, L-Cystine\*2HCl, Glycine, L-Histidine\*HCl\*H<sub>2</sub>O, L-Isoleucine, L-Leucine, L-Lysine\*HCl, L-Methionine, L-Phenylalanine, L-Serine, L-Threonine, L-Tryptophan, L-Valine, L-Tyrosine\*2Na\*2H<sub>2</sub>O, Folic Acid, Riboflavin, D-Ca-Pantothenate, Choline Chloride, i-Inositol, Nicotinamide, Pyridoxine\*HCl, Thiamine\*HCl
